# Supplementary material for: Drinking Water Arsenic and Adverse Reproductive Outcomes in Men and Women: A Systematic PRISMA Review
Source: MDPI journal article supplement (doi:10.3390/w13141885), 2021-07-07
Supplement: s1 [file s1]

Archive with 1 entries (1 files):
- Supplementary material.pdf
