# Supplementary material for: Drinking Water Arsenic and Adverse Reproductive Outcomes in Men and Women: A Systematic PRISMA Review
Source: MDPI journal article supplement (doi:10.3390/w13141885), 2021-07-07
Supplement: s1 [file s1 › Supplementary material.pdf]

## Supplementary material.

### Drinking water arsenic and adverse reproductive outcomes in men and women: A systematic PRISMA review.

Ida M. Barsøe <sup>1,\*</sup>, Ninna H. Ebdrup <sup>1,2</sup>, Hannah S. Clausen <sup>1</sup>, Julie Lyngsø <sup>3</sup>, Jörg Schullehner <sup>4,5</sup>, Cecilia H. Ramlau-Hansen <sup>3</sup>, Bjørn Bay <sup>2</sup>, Ulla B. Knudsen <sup>1,2</sup>

<sup>1</sup> Department of Clinical Medicine, Aarhus University, 8200 Århus N, Denmark; ida.barsoee@gmail.com (I.M.B.); ninebd@clin.au.dk (N.H.E.); hannahsvinth@gmail.com (H.S.V.); ullaknud@rm.dk (U.B.K.).

<sup>2</sup> Department of Obstetrics and Gynecology, Fertility Clinic, Horsens Regional Hospital, Denmark; bjornbay@me.com (B.B)

<sup>3</sup> Department of Public Health, Research Unit for Epidemiology, Aarhus University, 8000 Århus C, Denmark; jlyn@ph.au.dk (J.L.); chrh@ph.au.dk (C.H.R.-H.).

<sup>4</sup> Department of Public Health, Research Unit for Environment, Work and Health, Aarhus University, 8000 Århus C, Denmark; jorg.schullehner@ph.au.dk (J.S.).

<sup>5</sup> Geological Survey of Denmark and Greenland (GEUS), Denmark

\*Correspondence: ida.barsoee@gmail.com

#### Contents of this file

|                                                      |   |
|------------------------------------------------------|---|
| Text S1: Full search strategy (PubMed/Medline) ..... | 2 |
| Text S2: Data extraction form .....                  | 3 |
| Text S3: Elaborated reasons for exclusions.....      | 4 |
| Text S4: Newcastle-Ottawa Scale.....                 | 5 |
| Table S4: Scores.....                                | 5 |
| Text S4.1: Explanatory form .....                    | 6 |
| References, Supplementary Material .....             | 8 |

#### Introduction

This supplementary material includes search strategy, specifics of data extraction, elaboration of selection process and specifics on quality assessment of included literature in the systematic PRISMA review.

### **Text S1: Search strategy (PubMed/Medline)**

(arsenic[MeSH] OR arsenic OR arsenic poisoning[MeSH] OR arsenic poisoning) AND (drinking water[MeSH] OR drinking water OR potable water OR ground water[MeSH] OR ground water OR water pollution[MeSH] OR water pollution OR tap water) NOT (rats OR rat OR mice OR mouse OR animals OR animal) AND (pregnancy[Title/Abstract] OR Reproduction[MeSH] OR reproduction OR fertility[MeSH] OR fertility OR fecundity OR infertility[MeSH] OR infertility OR subfertility OR menstruation disturbances[MeSH] OR menstruation disturbances OR adverse reproductive outcomes OR reproductive techniques, assisted[MeSH] OR assisted reproductive technology OR ART treatment[Title/Abstract] OR fertility treatment OR reproductive techniques[MeSH] OR reproductive techniques OR time-to-pregnancy[MeSH] OR time to pregnancy OR pregnancy Rate[MeSH] OR pregnancy rate OR pregnancy outcome OR abortion, spontaneous[MeSH] OR abortion OR miscarriage OR fetal loss OR fetal death OR fetal mortality[MeSH] OR fetal mortality OR pregnancy loss OR pregnancy complications[MeSH] OR pregnancy complications OR semen analysis[MeSH] OR semen analysis OR sperm quality OR semen quality OR sperm count OR sperm motility OR spermatogenesis[MeSH] OR spermatogenesis)

*Search conducted on 24.5.19. Repeated on 13.11.19.*

## **Text S2: Data extraction form**

The following information was extracted from all included studies:

- Author
- Study title
- Country of origin
- Year of publication and journal
- Study design
- Study population /size and selection
- Exposure
- Outcome
- Confounding control
- Results
- Data for quality scoring using the Newcastle-Ottawa Scale.

## **Text S3: Elaborated reasons for exclusion**

### **PubMed/Medline, Embase and Scopus database searches:**

- The computerised literature search resulted in n=786 citations (PubMed/Medline: n=160; Embase: n=335; Scopus: n=291)
- Duplicates in the three databases: n=355
- From PubMed, Embase and Scopus searches in total included: n=431

### **Reference list search:**

- Potential unique citations: n=2
- Duplicates (i.e. included in the search from PubMed, Embase and Scopus: n=0)

**Total number of unique records identified: n=433**

**Records excluded based on title and abstract: n=399**

**Full-text articles assessed for eligibility: n=34**

### **Full text articles excluded due to the following reasons: n=26**

- Wrong outcome, instead reporting: n=6
  - o Preterm delivery, size at birth [1]
  - o Stillbirth, infant mortality [2]
  - o Stillbirth, birth defects, birthweight [3]
  - o Preterm birth, size at birth [4]
  - o Arsenic levels in drinking water [5]
  - o Neoplasms, endocrine, nutritional and metabolic diseases, blood diseases, nervous system diseases circulatory system diseases, ischemic heart disease, cerebrovascular disease, heart failure, respiratory system diseases, digestive system diseases, urinary system diseases, skin and subcutaneous tissue diseases, musculoskeletal and connective tissue system diseases [6]
- Wrong study design, instead the following designs: n=13
  - o Commentary [7, 8]
  - o Cross-sectional [9-14]
  - o Summary [15, 16]
  - o Book chapter [17, 18]
  - o Conference abstract [19]
- Wrong exposure assessment, instead reporting: n=4
  - o Blood samples [20]
  - o Urinary samples [21-23]
- Doublet: n=1
  - o [5]
- Language restriction: n=2
  - o [24, 25]

## Text S4: Newcastle-Ottawa scale (NOS)

Characteristics and risk of bias table for publications on arsenic exposure from drinking water and spontaneous abortion.

Table S4: Newcastle-Ottawa scale scores

| Author, year, country                | Study design               | Risk of bias |               |                  |                 |
|--------------------------------------|----------------------------|--------------|---------------|------------------|-----------------|
|                                      |                            | Selection    | Comparability | Exposure/outcome | Total NOS-score |
| <b>Women</b>                         |                            |              |               |                  |                 |
| Ahmed et. al, 2019, Bangladesh [26]  | Prospective cohort study   | ****         | **            | **               | 8               |
| Aschengrau et. al, 1989, US [27]     | Case-control study         | ****         | **            | **               | 9               |
| Banu et. al, 2013, Bangladesh [28]   | Prospective cohort study   | ***          | -             | *                | 4               |
| Bloom et. al, 2014, Romania [29]     | Case-control study         | ***          | **            | ***              | 8               |
| Mukherjee et. al, 2005, India [30]   | Retrospective cohort study | *            | -             | *                | 2               |
| Rahman et. al, 2007, Bangladesh [31] | Prospective cohort study   | ***          | **            | *                | 6               |
| Susko et. al, 2017, Romania [32]     | Retrospective cohort study | **           | **            | **               | 6               |
| <b>Men</b>                           |                            |              |               |                  |                 |
| Sengupta et. al, 2013, India [33]    | Case-control study         | **           | **            | **               | 6               |

In each category (i.e. selection, comparability and exposure/outcome), a range of zero to four \* could be awarded. The maximum total NOS-score is 9. Studies with a total NOS-score  $\geq 7$  are considered high quality studies.

#### **Text S4.1: Explanatory forms – Newcastle-Ottawa Scale.**

To ensure standardised scoring, this explanatory form has been made. Only those items from the NOS that needed a stricter definition are mentioned below. To access the full NOS see [34]

##### **Text S4.1.1: Cohort studies**

#### **Selection**

- 1) Representativeness of the exposed cohort: The average *woman of fertile age* OR *man of fertile age* in the community.
- 3) Ascertainment of exposure: A \* is awarded if a drinking water sample was taken from a supply that could be linked to the exposed/unexposed person's home address or was designated primary source of drinking water.

#### **Comparability**

- 1) Comparability of cohorts based on the design or analysis: *Maternal age* is chosen as the most important control factor for women and *smoking* is chosen as the most important control factor for men. Other factors for women include: Parity, previous abortions, educational level, smoking during pregnancy. Other factors for men include: BMI, age.

#### **Outcome**

- 1) Assessment of outcome: In cases where information on outcome is based on self-report, no \* is awarded – even if the information is obtained by a healthcare worker.
- 2) Was follow-up long enough for outcomes to occur: Adequate follow up period is set at *12 months* after enrolment (it will thus leave a sufficient margin for all outcomes of relevance to occur).
- 3) Adequacy of follow up of cohorts: A small number lost is defined as <20%. It must, however, be stated that differences between groups should be considered, and a large difference should lead to a downgrading and thus no \* should be awarded.

##### **Text S4.1.2: Case-control studies**

#### **Selection**

- 3) Selection of Controls: *Community controls* will be defined as an uncomplicated pregnancy. Even though most pregnant women will have contact with medical facilities during their pregnancies, it will not categorise them as *hospital controls* as routine check-ups and labor are not of a pathologic nature.
- 4) Definition of Controls: A \* will be awarded if it is described that the controls are women with uncomplicated pregnancies and normal deliveries (no preterm delivery, stillbirth, malformed children), as these outcomes might have a shared pathogenesis with spontaneous abortion.

#### **Comparability**

- 1) Comparability of cases and controls based on the design or analysis: *Maternal age* is chosen as the most important control factor for women and *smoking* is chosen as the most important control factor for men. Other factors for women include: Parity, previous abortions, educational level, smoking during pregnancy. Other factors for men include: BMI, age.

#### **Exposure**

- 3) Ascertainment of exposure: A \* is awarded if a drinking water sample was taken from a supply that could be linked to the case/control's home address or was designated primary source of drinking water.

## References, Supplementary Material

- 1 Bloom, M.S.; Neamtiu, I.A.; Surdu, S.; Pop, C.; Anastasiu, D.; Appleton, A.A.; Fitzgerald, E.F.; Gurzau, E.S. Low level arsenic contaminated water consumption and birth outcomes in Romania-An exploratory study. *Reprod. Toxicol.* **2016**, *59*, 8–16.
- 2 Hopenhayn-Rich, C.; Browning, S.R.; Hertz-Picciotto, I.; Ferreccio, C.; Peralta, C.; Gibb, H. Chronic arsenic exposure and risk of infant mortality in two areas of Chile. *Environ. Health Perspect.* **2000**, *108*, 667–673.
- 3 Kwok, R.K.; Kaufmann, R.B.; Jakariya, M. Arsenic in drinking-water and reproductive health outcomes: A study of participants in the Bangladesh integrated nutrition programme. *J. Health Popul. Nutr.* **2006**, *24*, 190–205.
- 4 Laine, J.E.; Bailey, K.A.; Rubio-Andrade, M.; Olshan, A.F.; Smeester, L.; Drobná, Z.; Herring, A.K.; Styblo, M.; Garcia-Vargas, G.G.; Fry, R.C. Maternal arsenic exposure, arsenic methylation efficiency, and birth outcomes in the biomarkers of exposure to ARsenic (BEAR) pregnancy cohort in Mexico. *Environ. Health Perspect.* **2015**, *123*, 186–192.
- 5 Neamtiu, I.; Bloom, M.S.; Gati, G.; Goessler, W.; Surdu, S.; Pop, C.; Braeuer, S.; Fitzgerald, E. F.; Baciuc, C.; Lupsa, I. R.; et al. Pregnant women in Timis County, Romania are exposed primarily to low-level (<10µg/l) arsenic through residential drinking water consumption. *Int. J. Hyg. Environ. Health* **2015**, *218*, 371–379.
- 6 Profili, F.; Nuvolone, D.; Barbone, F.; Aprea, C.; Centi, L.; Frazzetta, R.; Belli, S.; Voller, F. Health effects among a cohort exposed to low-level arsenic in a geothermal area of Tuscany, Italy. *Int. Arch. Occup. Environ. Health* **2018**, *91*, 971–979.
- 7 Birnbaum, L.S. The effect of environmental chemicals on human health. *Fertil. Steril.* **2008**, *89* (suppl. 2), e31.
- 8 Testai, E. The presence of arsenic in drinking water: Any risk for the exposed population?. *Epidemiol. Prev.* **2011**, *35*, 81–82.
- 9 Chakraborti, D.; Rahman, M.M.; Ahamed, S.; Dutta, R.N.; Pati, S.; Mukherjee, S.C. Arsenic contamination of groundwater and its induced health effects in Shahpur block, Bhojpur district, Bihar state, India: Risk evaluation. *Environ. Sci. Pollut. Res. Int.* **2016**, *23*, 9492–9504.
- 10 Rahamatullah, M.; Ara, K.Z.G.; Sultana, T.; Jahan, R. Effects of drinking arsenic contaminated water on spontaneous abortion and neonatal mortality. *Adv. Environ. Biol.* **2010**, *4*, 152–154.
- 11 Sen, J.; Chaudhuri, A.B.D. Arsenic exposure through drinking water and its effect on pregnancy outcome in Bengali women. *Arh. Hig. Rada Toksikol.* **2008**, *59*, 271–275.
- 12 Von Ehrenstein, O.S.; Guha Mazumder, D.N.; Hira-Smith, M.; Ghosh, N.; Yuan, Y.; Windham, G.; Ghosh, A.; Haque, R.; Lahiri, S.; Kalman, D., et al. Pregnancy outcomes, infant mortality, and arsenic in drinking water in West Bengal, India. *Am. J. Epidemiol.* **2006**, *163*, 662–669.
- 13 Ahmad, S.A.; Sayed, M.H.; Barua, S.; Khan, M.H.; Faruquee, M.H.; Jalil, A.; et al. Arsenic in drinking water and pregnancy outcomes. *Environ. Health Perspect.* **2001**, *109*, 629–631.
- 14 Xu, W.; Bao, H.; Liu, F.; Liu, L.; Zhu, Y.G.; She, J.; Dong, S.; Cai, M.; Li, L.; Li, C., et al. Environmental exposure to arsenic may reduce human semen quality: Associations derived from a Chinese cross-sectional study. *Environ. Health Glob. Access Sci. Source* **2012**, *11*, 46.
- 15 Chakraborti, D.; Rahman, M.M.; Das, B.; Chatterjee, A.; Das, D.; Nayak, B.; Pal, A.; Chowdhury, U.K.; Ahmed, S.; Biswas, B.K., et al. Groundwater arsenic contamination and its health effects in India. *Hydrogeol. J.* **2017**, *25*, 1165–1181.
- 16 Csanady, M.; Straub, I. (Eds.) *Health Damage Due to Water Pollution in Hungary C3; Assessing and Managing Health Risks from Drinking Water Contamination: Approaches and Applications* (Proceedings of the Rome Symposium, September 1994). IAHS Publication: No 233, 1995.
- 17 Das, B.; Nayak, B.; Pal, A.; Ahamed, S.; Hossain, M.A.; Sengupta, M.K.; Rahman, M. M.; Maity, S.; Saha, K. C.; Chakraborti, D., et al. Groundwater arsenic contamination and its health effects in the Ganga-Meghna-Brahmaputra plain. In *Groundwater for Sustainable Development: Problems, Perspectives and Challenges*; Taylor and Francis Group; London; UK; 2008; pp. 257–269.
- 18 Ríos, P.; Cortés, S.; Villarroel, L.; Ferreccio, C. (Eds.) Historical exposure to arsenic in drinking water and risk of late fetal and infant mortality—Chile 1950–2005 C3—One Century of the Discovery of Arsenicosis in Latin America (2014). In *Proceedings of the 5th International Congress on Arsenic in the Environment*, Buenos Aires, Argentina, 11–16 May 2014.
- 19 Argos, M.; Parvez, F.; Ahsan, H. Arsenic exposure, pregnancy outcomes, and infant health in Bangladesh. *Am. J. Epidemiol.* **2011**, *173*, S46.
- 20 Meeker, J.D.; Rossano, M.G.; Protas, B.; Diamond, M.P.; Puscheck, E.; Daly, D.; Paneth, N.; Wirth, J.J. Cadmium, lead, and other metals in relation to semen quality: Human evidence for molybdenum as a male reproductive toxicant. *Environ. Health Perspect.* **2008**, *116*, 1473–1479.
- 21 Wang, X.; Zhang, J.; Xu, W.; Huang, Q.; Liu, L.; Tian, M.; et al. Low-level environmental arsenic exposure correlates with unexplained male infertility risk. *Sci. Total Environ.* **2016**, *571*, 307–313.

- 22 Shih, Y.H.; Islam, T.; Hore, S.K. Sarwar, G.; Shahriar, M.H.; Yunus, M.; Graziano, J.H.; Harjes, J.; Baron, J.A.; Parvez, F., et al. Associations between prenatal arsenic exposure with adverse pregnancy outcome and child mortality. *Environ. Res.* **2017**, *158*, 456–461.
- 23 Rahman, A.; Persson, L.A.; Nermell, B.; El Arifeen, S.; Ekström, E.C.; Smith, A.H.; Vahter, M. Arsenic exposure and risk of spontaneous abortion, stillbirth, and infant mortality. *Epidemiology* **2010**, *21*, 797–804.
- 24 Ogata, T.; Nakamura, Y.; Endo, G.; Hayashi, T.; Honda, Y. Subjective symptoms and miscarriage after drinking well water exposed to diphenylarsinic acid. *Jpn. J. Public Health* **2014**, *61*, 556–564.
- 25 Yang, W.H.; Guo, Z.W.; Han, X.H.; Xia, Y.J.; Wu, K.G.; Li, Y.H. Influence of arsenic exposure on menstruation. *Chin. J. Endem.* **2013**, *32*, 27–29.
- 26 Ahmed, S.M.; Noble, B.N.; Joya, S.A.; Ibn Hasan, M.O.S.; Lin, P.I.; Rahman, M.L.; Mostofa, G.; Quamruzzaman, Q.; Rahman, M.; Christiani, D.C., et al. A Prospective Cohort Study Examining the Associations of Maternal Arsenic Exposure with Fetal Loss and Neonatal Mortality. *Am. J. Epidemiol.* **2019**, *188*, 347–354.
- 27 Aschengrau, A.; Zierler, S.; Cohen, A. Quality of community drinking water and the occurrence of spontaneous abortion. *Arch. Environ. Health* **1989**, *44*, 283–290.
- 28 Banu, S.A.; Kile, M.L.; Christiani, D.C.; Qumruzzaman, Q. Study of prenatal arsenic exposure and reproductive health outcome in Bangladesh. *Bangladesh J. Obstet. Gynecol.* **2013**, *28*, 76–81.
- 29 Bloom, M.S.; Neamtiu, I.A.; Surdu, S.; Pop, C.; Lupsa, I.R.; Anastasiu, D.; Fitzgerald, E.F.; Gurzau, E.S. Consumption of low-moderate level arsenic contaminated water does not increase spontaneous pregnancy loss: A case control study. *Environ. Health Glob. Access Sci. Source* **2014**, *13*, 1–10.
- 30 Mukherjee, S.C.; Saha, K.C.; Pati, S.; Dutta, R.N.; Rahman, M.M.; Sengupta, M.K.; Ahamed, S.; Lodh, D.; Das, B.; Hossain, M., et al. Murshidabad—one of the nine groundwater arsenic-affected districts of West Bengal, India. Part II: Dermatological, neurological, and obstetric findings. *Clin. Toxicol.* **2005**, *43*, 835–848.
- 31 Rahman, A.; Vahter, M.; Ekström, E.C.; Rahman, M.; Golam Mustafa, A.H.M.; Wahed, M.A.; Yunus, M.; Persson, L.Å. Association of arsenic exposure during pregnancy with fetal loss and infant death: A cohort study in Bangladesh. *Am. J. Epidemiol.* **2007**, *165*, 1389–1396.
- 32 Susko, M.L.; Bloom, M.S.; Neamtiu, I.A.; Appleton, A.A.; Surdu, S.; Pop, C.; Fitzgerald, E.F.; Anastasiu, D.; Gurzau, E.S. Low-level arsenic exposure via drinking water consumption and female fecundity — A preliminary investigation. *Environ. Res.* **2017**, *154*, 120–125.
- 33 Sengupta, M.; Deb, I.; Sharma, G.D.; Kar, K.K. Human sperm and other seminal constituents in male infertile patients from arsenic and cadmium rich areas of Southern Assam. *Syst. Biol. Reprod. Med.* **2013**, *59*, 199–209.
- 34 Wells, G.S.B.; O'Connell, D.; Peterson, J.; Welch, V.; Losos, M.; Tugwell, P. The Newcastle-Ottawa Scale (NOS) for Assessing the Quality of Nonrandomised Studies in Meta-Analyses. Available online: [http://www.ohri.ca/programs/clinical\\_epidemiology/oxford.asp](http://www.ohri.ca/programs/clinical_epidemiology/oxford.asp) (accessed on 15.11.19).
